# Supplementary material for: SARS-CoV-2 spike T cell responses induced upon vaccination or infection remain robust against Omicron
Source: bioRxiv or medRxiv preprint supplement (doi:10.1101/2021.12.26.21268380), 2021-12-28
Supplement: Supplementary file [file media-1.pdf]

**Supplementary Table 1**

| <b>Vaccinee cohorts</b>                    | <b>Vaccinees (all)</b> | Without prior infection | With prior infection |
|--------------------------------------------|------------------------|-------------------------|----------------------|
| <b>Ad26.COVS (Janssen) - 1 dose</b>        |                        |                         |                      |
| Number                                     | 20                     | 7                       | 13                   |
| Age (y) (median, IQR)                      | 41 [32-52]             | 44 [32-54]              | 41 [32-48]           |
| Gender (% female)                          | 75%                    | 71.4%                   | 76.9%                |
| With co-morbidities (n, %)                 | 6/20 (30%)             | 2/7 (28.6%)             | 4/13 (30.8%)         |
| Days since last vaccine dose (median, IQR) | 28 [28-32]             | 31 [28-34]              | 28 [27-29]           |
| Months since COVID episode (median, IQR)   | -                      | na                      | 3 [2-6]*             |
| <b>Ad26.COVS (Janssen) - 2 doses</b>       |                        |                         |                      |
| Number                                     | 20                     | 6                       | 14                   |
| Age (y) (median, IQR)                      | 38 [33-56]             | 58 [36-62]              | 36 [32-44]           |
| Gender (% female)                          | 75%                    | 83.3%                   | 71.4%                |
| With co-morbidities (n, %)                 | 9/20 (45%)             | 4/6 (66.7%)             | 5/14 (35.7%)         |
| Days since last vaccine dose (median, IQR) | 22 [21-24]             | 23 [21-25]              | 22 [21-23]           |
| Months since COVID episode (median, IQR)   | -                      | na                      | 15 [11-18]           |
| <b>BNT162b2 (Pfizer) - 2 doses</b>         |                        |                         |                      |
| Number                                     | 15                     | 9                       | 6                    |
| Age (y) (median, IQR)                      | 53 [45-71]             | 53 [41-74]              | 57 [44-66]           |
| Gender (% female)                          | 53.3%                  | 44.4%                   | 66.7%                |
| With co-morbidities (n, %)                 | 9/15 (60%)             | 4/9 (44.4%)             | 5/6 (83.3%)          |
| Days since last vaccine dose (median, IQR) | 33 [22-48]             | 46 [23-65]              | 27 [20-38]           |
| Months since COVID episode (median, IQR)   | -                      | na                      | 14 [13-15]           |

**Supplementary Table 1: Clinical characteristics of vaccinee cohorts.**

Co-morbidities include: asthma, hypertension, obesity or diabetes mellitus.

\*: data regarding time post Covid-19 infection were available for only 6 out of the 13 participants who received 1 dose of Ad26-COV.S.

## Supplementary Table 2

| Convalescent cohort (unvaccinated)       |             |
|------------------------------------------|-------------|
| Number                                   | 15          |
| Age (y) (median, IQR)                    | 39 [35-49]  |
| Gender (% female)                        | 12%         |
| With co-morbidities (n, %)               | 6/15 (40%)  |
| Months since COVID episode (median, IQR) | 1.4 [1.3-6] |

**Supplementary Table 2: Clinical characteristics of convalescent COVID-19 patients.**

Co-morbidities include: asthma, hypertension, obesity or diabetes mellitus.

Supplementary Table 3

| Hospitalized COVID-19 cohort    | Total         | Wave 1<br>(Ancestral) | Wave 2<br>(Beta) | Wave 3<br>(Delta) | Wave 4<br>(Omicron) |
|---------------------------------|---------------|-----------------------|------------------|-------------------|---------------------|
| Number                          | 68            | 17                    | 16               | 16                | 19                  |
| Age (y) (median, range)         | 53 [39-64]    | 55 [41-62]            | 64 [53-68]       | 49 [37-63]        | 47 [35-60]          |
| Gender (% female)               | 47%           | 29.4%                 | 56.2%            | 56.2%             | 47.4%               |
| With co-morbidities (n, %)      | 53/68 (77.9%) | 11/17 (64.7%)         | 15/16 (93.7%)    | 13/16 (81.2%)     | 14/19 (73.7%)       |
| Day since PCR+ (median, range)  | 4 [2-8]       | 2 [1-3.5]             | 5 [2-10]         | 6 [2-10]          | 4 [3-6]             |
| Severe COVID-19 (WHO $\geq 5$ ) | 26/68 (38.2%) | 7/17 (41.2%)          | 1/16 (6.25%)     | 9/16 (56.2%)      | 9/19 (47.4%)        |

**Supplementary Table 3: Clinical characteristics of hospitalized COVID-19 patient cohort.**

Co-morbidities include: asthma, hypertension, obesity or diabetes mellitus. Severe COVID-19 was defined based on oxygen therapy requirement according to the WHO ordinal scale scoring system (O<sub>2</sub> via high flow to extracorporeal membrane oxygenation).
